# Supplementary material
Source: Springer Nature journal article supplement (https://www.springermedizin.de/resource/supplementary/12885_2014_4779_MOESM1_ESM.pdf/9467250)

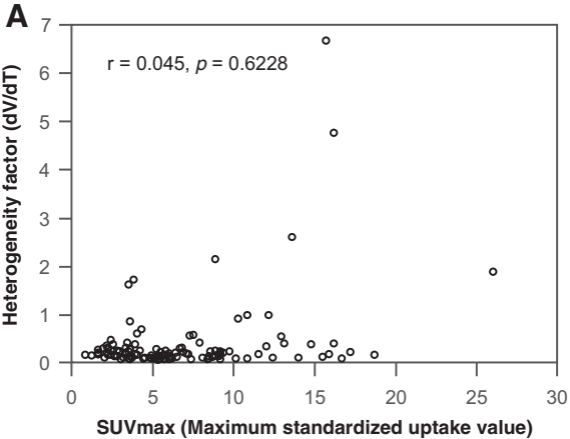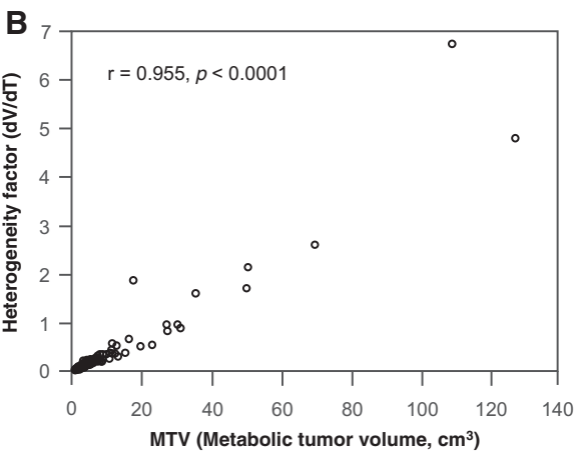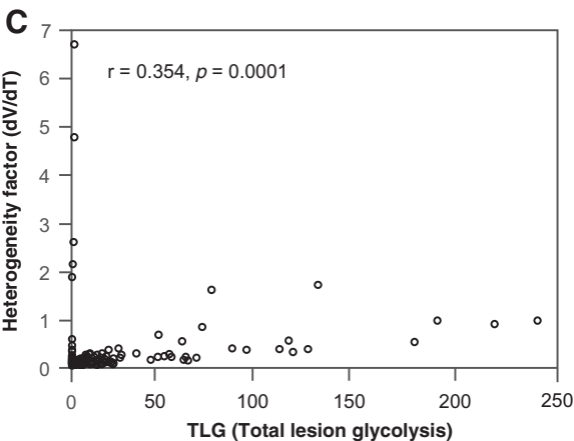

Supplement: MOESM1 [file 9467250]
